# Supplementary material for: Population genetics of an invasive mosquito vector, Aedes albopictus in the Northeastern USA
Source: NeoBiota. Author manuscript; Available in PMC 2023 Jul 5. (PMC10321554; doi:10.3897/neobiota.78.84986)
Supplement: Supplementary material 01 [file NIHMS1858977-supplement-Supplementary_material_01.xlsx]

## Sheet: Population size
Population	State, Country	Year	Code	Latitude	Longitud	N
SanGabriel, CA	California, USA	2018	SG18	34.09	-118	47
Bridgeport, CT	Connecticut, USA	2018	BP18	41.18	-73.2	48
Bridgeport, CT	Connecticut, USA	2019	BP19	41.18	-73.2	35
Bridgeport, CT	Connecticut, USA	2020	BP20	41.18	-73.2	47
Milford, CT	Connecticut, USA	2018	MF18	41.21	-73.07	48
NewHaven, CT	Connecticut, USA	2018	NH18	41.32	-72.93	48
Norwalk, CT	Connecticut, USA	2018	NO18	41.06	-73.43	48
Norwalk, CT	Connecticut, USA	2020	NO20	41.06	-73.43	46
Stamford, CT	Connecticut, USA	2020	SM20	41.05	-73.5	48
Stratford, CT	Connecticut, USA	2018	ST18	41.17	-73.12	48
Stratford, CT	Connecticut, USA	2019	ST19	41.17	-73.12	18
Stratford, CT	Connecticut, USA	2020	ST20	41.17	-73.12	48
WestHaven, CT	Connecticut, USA	2018	WH18	41.28	-72.94	46
WestHaven, CT	Connecticut, USA	2019	WH19	41.28	-72.94	39
WestHaven, CT	Connecticut, USA	2020	WH20	41.28	-72.94	46
Lincoln, DE	Delaware, USA	2015	DW	38.88	-75.42	25
Washington, DC	District of Columbia, USA	2018	DCB18	38.9	-77.03	47
VeroBeach, FL	Florida, USA	2018	VB18	27.58	-80.37	24
Riverdale, MD	Maryland, USA	2015	MD	38.96	-76.92	28
NewBedford, MA	Massachussetts, USA	2018	NB18	41.66	-70.93	39
Mercer, NJ	New Jersey, USA	2018	MC18	40.22	-74.73	48
Tappan, NY	New York, USA	2018	DRT1B	41.04	-73.96	41
Fire Island, NY	New York, USA	2018	FI18	40.71	-72.94	48
Selden, NY	New York, USA	2019	FR19	40.9	-73.04	26
Riverhead, NY	New York, USA	2019	RH19	40.98	-72.69	45
Bayview, NY	New York, USA	2019	SD19	41.039	-72.41	34
Babylon, NY	New York, USA	2018	SU18	40.77	-73.34	46
SpringValley, NY	New York, USA	2018	SV18	41.14	-74.02	28
Harrisburg, PA	Pennsylvania, USA	2015	PNN	40.37	-76.88	25
Philadelphia City, PA	Pennsylvania, USA	2018	PH18	39.96	-75.2	48
Fairfax, VA	Virginia, USA	2018	FX	38.74	-77.11	46
Manaus	Manaus, BZ	2017-2018	BZ	-3.06	-59.98	22
Tokyo, JP	Tokyo, JP	2017-2018	JAP	35.7	139.71	42
Chanthaburi, TH	Chanthaburi, TH	2016	THB	12.6	102.09	20
